# Supplementary material for: Two-dimensional oxygen-deficient ZnO1−x nanosheet as a highly selective and sensitive fluorescence probe for ferritin detection: the electron transfer biosensor (ETBS)
Source: Royal Society of Chemistry journal article supplement (doi:10.1039/d3tb02415f), 2024-01-01
Supplement: d3tb02415f1.pdf [file d3tb02415f1.pdf]

### Supporting Information

#### **Two-dimensional oxygen deficient ZnO<sub>1-x</sub> nanosheets as a highly selective fluorescence probe for ferritin detection: The electron transfer biosensor (ETBS)**

Priyanka Rana<sup>1</sup>, Sivakumar Musuvadhi Babulal<sup>1</sup>, Hui-Fen Wu\*<sup>1, 2, 3,4,5</sup>

<sup>1</sup>Department of Chemistry, National Sun Yat-Sen University, Kaohsiung, 70, Lien-Hai Road, Kaohsiung, 80424, Taiwan

<sup>2</sup>School of Pharmacy, College of Pharmacy, Kaohsiung Medical University, Kaohsiung, 807, Taiwan

<sup>3</sup>Institute of Medical Science and Technology, National Sun Yat-Sen University, Kaohsiung, 80424, Taiwan

<sup>4</sup>School of Medicine, College of Medicine, National Sun Yat-Sen University, Kaohsiung, 80424, Taiwan

<sup>5</sup>Institute of Precision Medicine, National Sun Yat-Sen University, Kaohsiung, 80424, Taiwan.

\*Corresponding author, Phone: +886-7-5252000-3955; Fax: +886-7-5253909

Email: [hwu@faculty.nsysu.edu.tw](mailto:hwu@faculty.nsysu.edu.tw) (Prof H.-F. Wu)

---

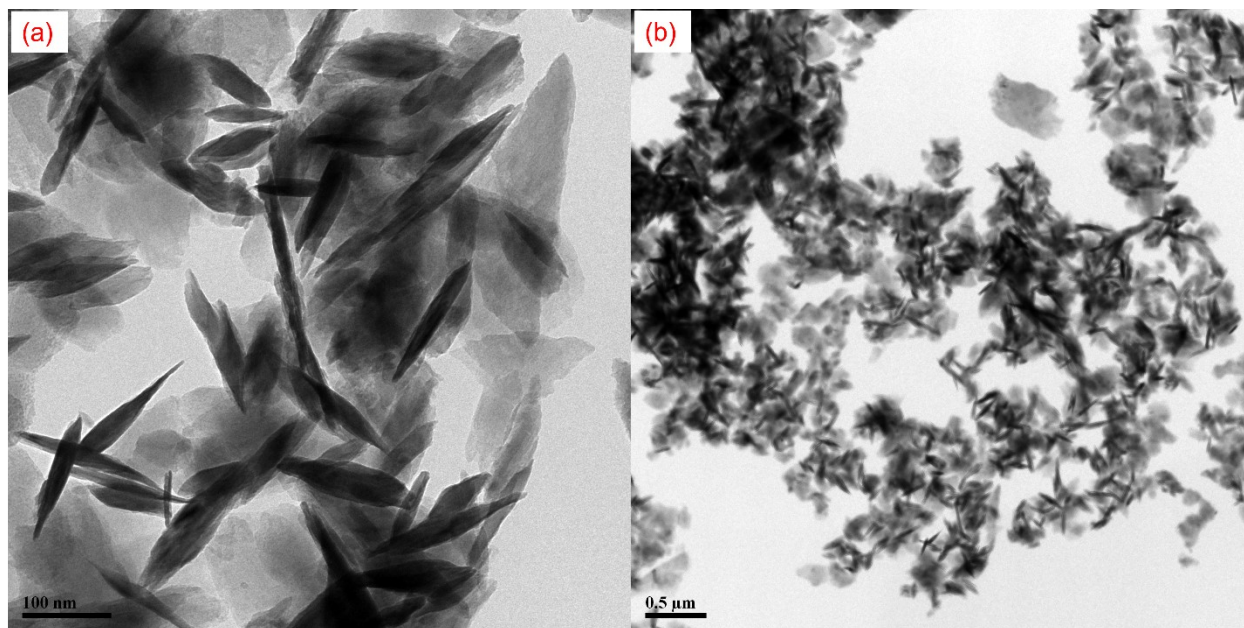

**Fig. S1.** Characterization of ZnO<sub>1-x</sub> nanosheets using TEM to detect the surface morphology of nanosheets for the scale of (a) 100 nm and (b) 0.5 μm scale.

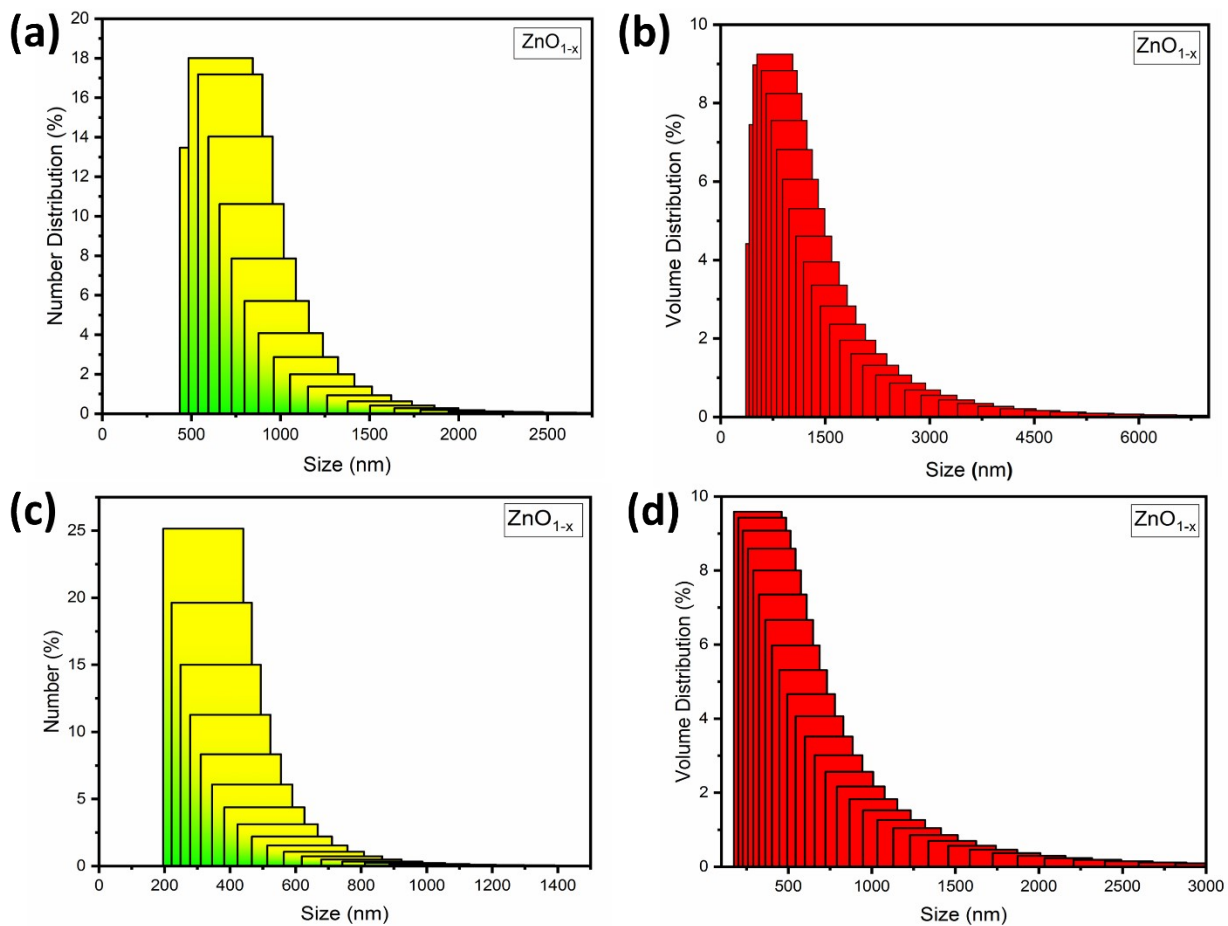

**Fig. S2.** Dynamic Light Scattering (DLS) size distribution; (a) % number distribution and (b) % volume distribution for synthesized  $\text{ZnO}_{1-x}$  nanosheets before probe-ultrasonication, (c), (d) shows size distribution after probe-ultrasonication.

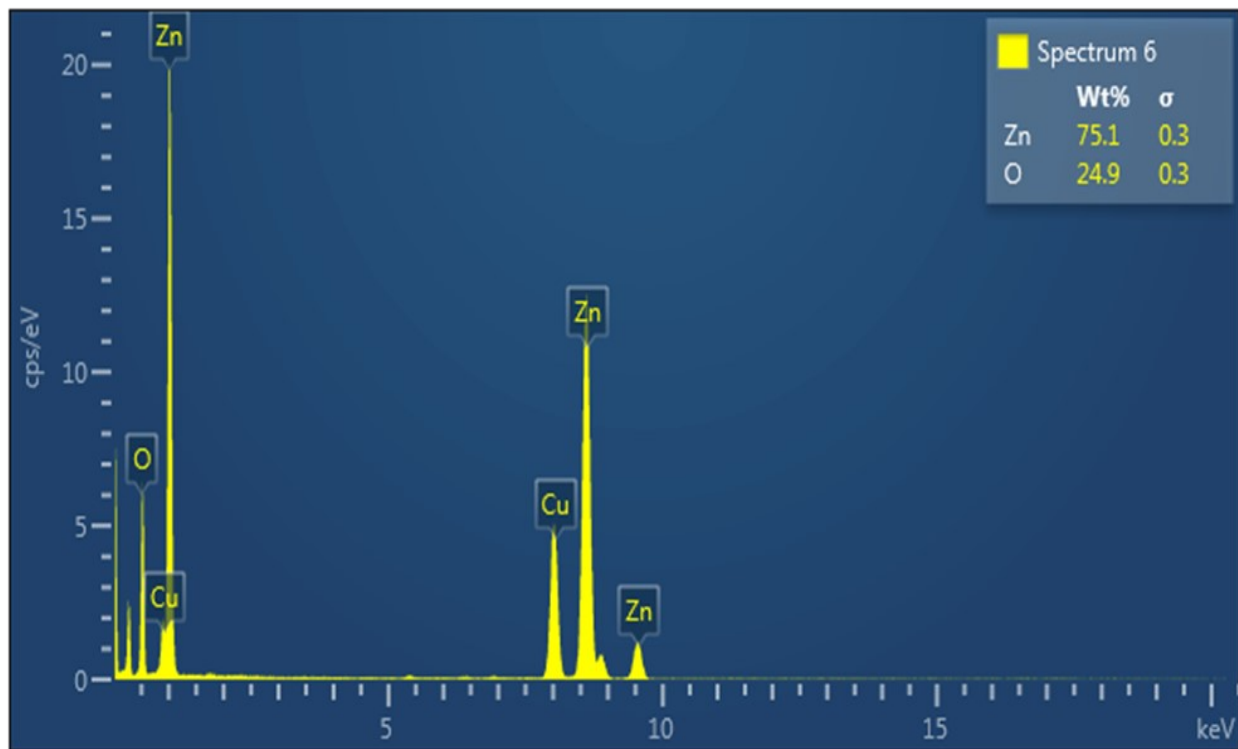

**Fig. S3.** Energy-dispersive X-ray spectra (EDS) of the synthesized  $\text{ZnO}_{1-x}$  nanosheets showing elemental mapping.

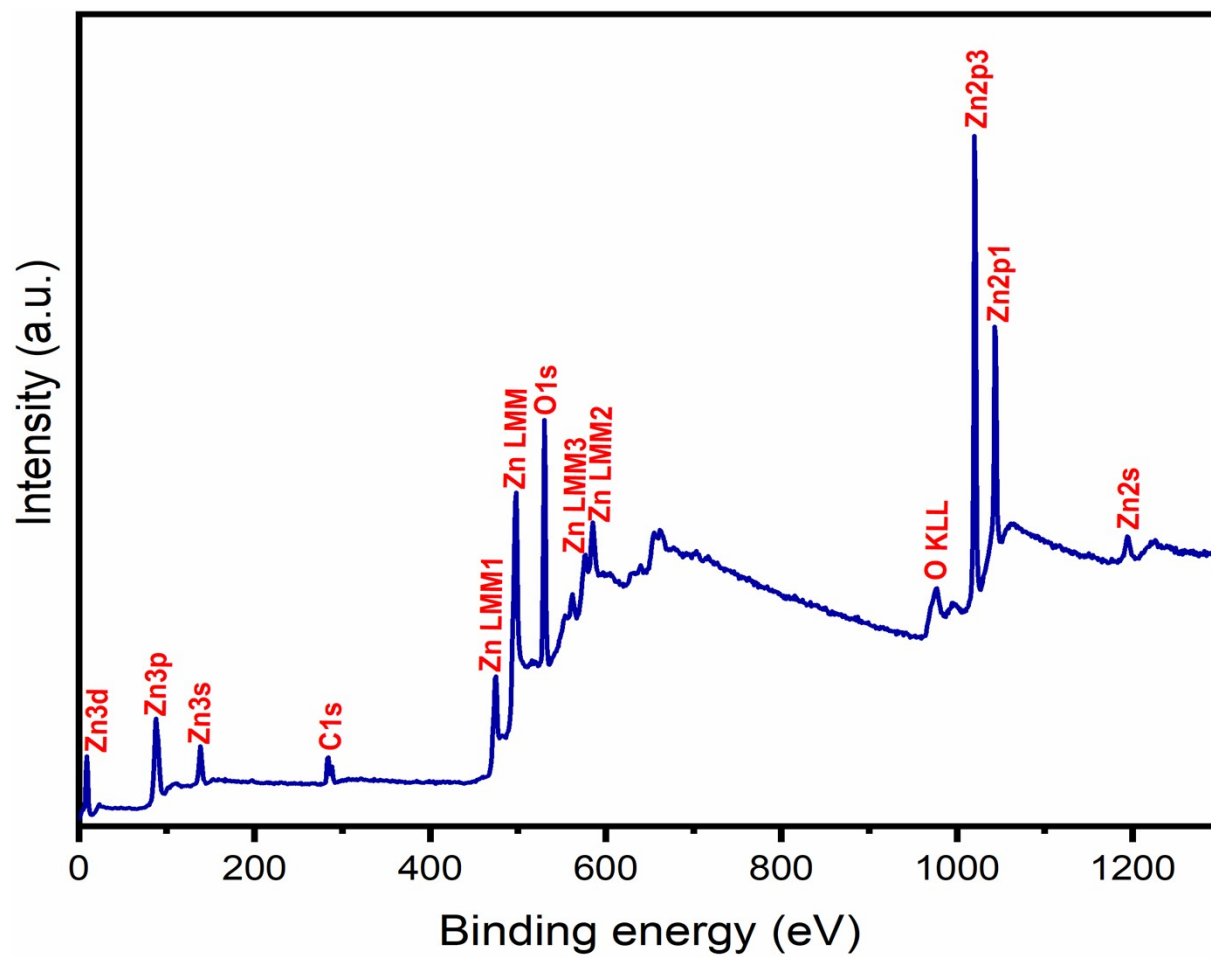

Fig. S4. XPS survey scan spectra for ZnO<sub>1-x</sub> nanosheets.

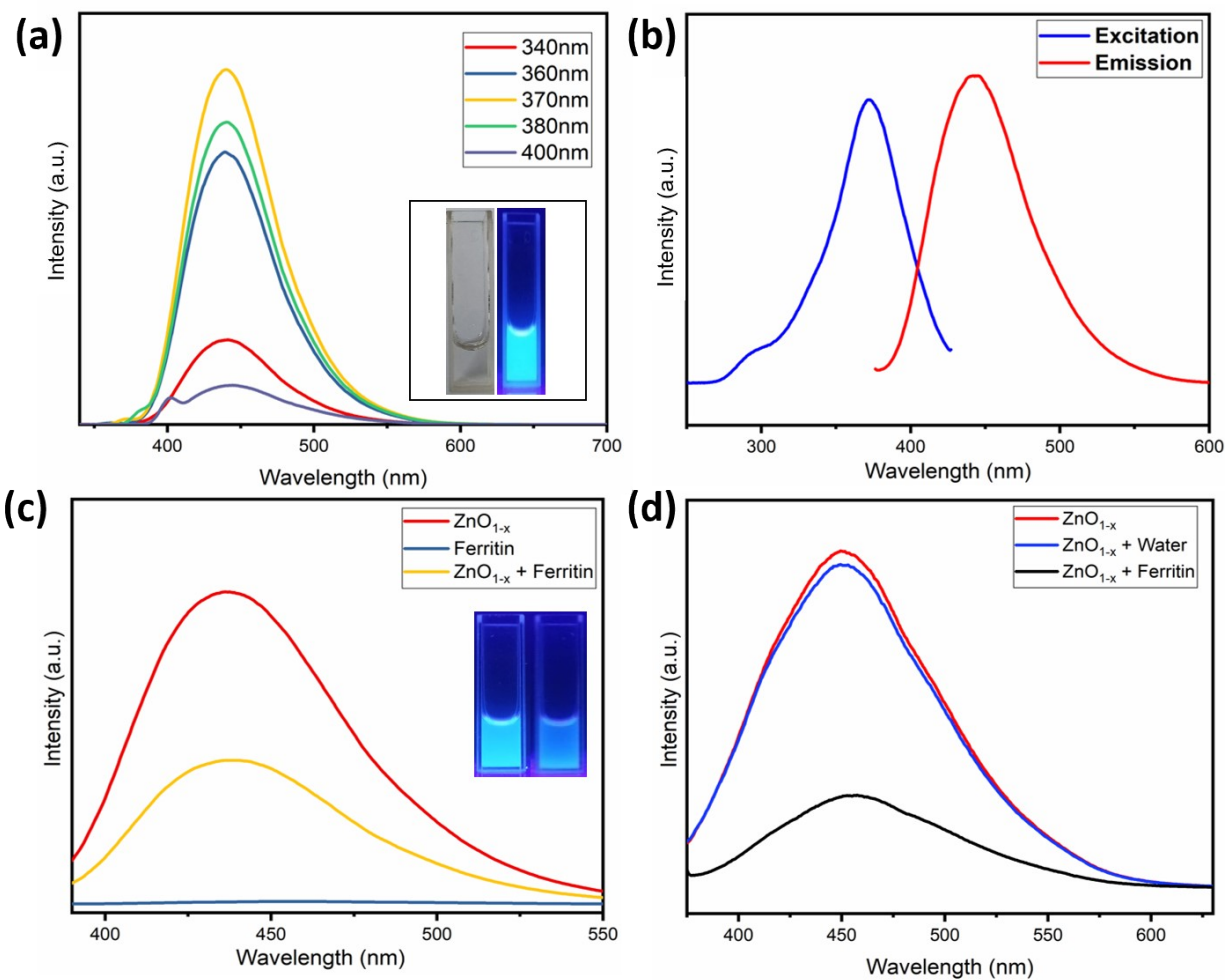

**Fig. S5.** PL study of the 2D  $ZnO_{1-x}$  nanosheets (a) Optimization of fluorescence intensity at various wavelengths, (b) Excitation and emission spectra for the  $ZnO_{1-x}$  nanosheets, (c) Fluorescence quenching experiment after the addition of ferritin, (d) Effect of dilution on fluorescence intensity of  $ZnO_{1-x}$  nanosheets.

## S1. Quantum yield equation

The quantum yield of the synthesized material was calculated using the equation as below:

$$\varphi_{ZnO_{1-x}} = \varphi_{Q.S} \times \frac{F(AUC)_{ZnO_{1-x}}}{F(AUC)_{Q.S}} \times \frac{Absorbance_{Q.S}}{Absorbance_{ZnO_{1-x}}} \times \frac{\eta_{ZnO_{1-x}}}{\eta_{Q.S}}$$

where  $\varphi$  is Quantum yield, Q.S. = Quinine sulfate (reference), F (AUC) = Fluorescence Area under the curve, Absorbance = Absorbance at 370 nm,  $\eta$  = Solvent refractive index of the sample (water: 1.333).

The quantum yield of  $ZnO_{1-x}$  was calculated using the values as:

$\varphi_{Q.S} = 54.6\%$ ,  $F(AUC)_{ZnO_{1-x}} = 46,672.54$ ,  $F(AUC)_{Q.S} = 60,260.0$ ,  $Absorbance_{Q.S} = 2.9$ ,  $Absorbance_{ZnO_{1-x}} = 2.62$  and  $\eta_{ZnO_{1-x}} = \eta_{Q.S} = 1.333$  (water as a solvent)

## S2. Quenching efficiency equation

The quenching efficiency (QE) of ferritin and all other interfering biomolecules was calculated using the equation below:

$$QE = \frac{(I_0 - I)}{I_0} \times 100$$

Where  $I_0$  and  $I$  are the fluorescence intensities of  $ZnO_{1-x}$  nanosheets without and with analyte, respectively.

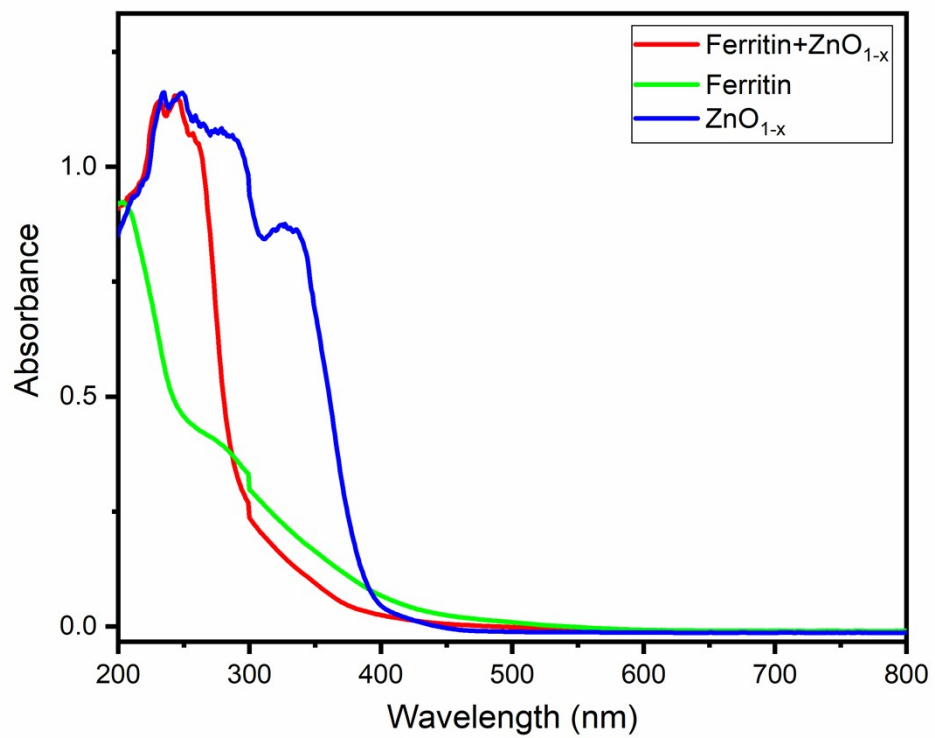

**Fig. S6.** UV-Vis absorption spectra for ferritin (green), bare ZnO<sub>1-x</sub> (blue) and ZnO<sub>1-x</sub> after addition of ferritin (red).



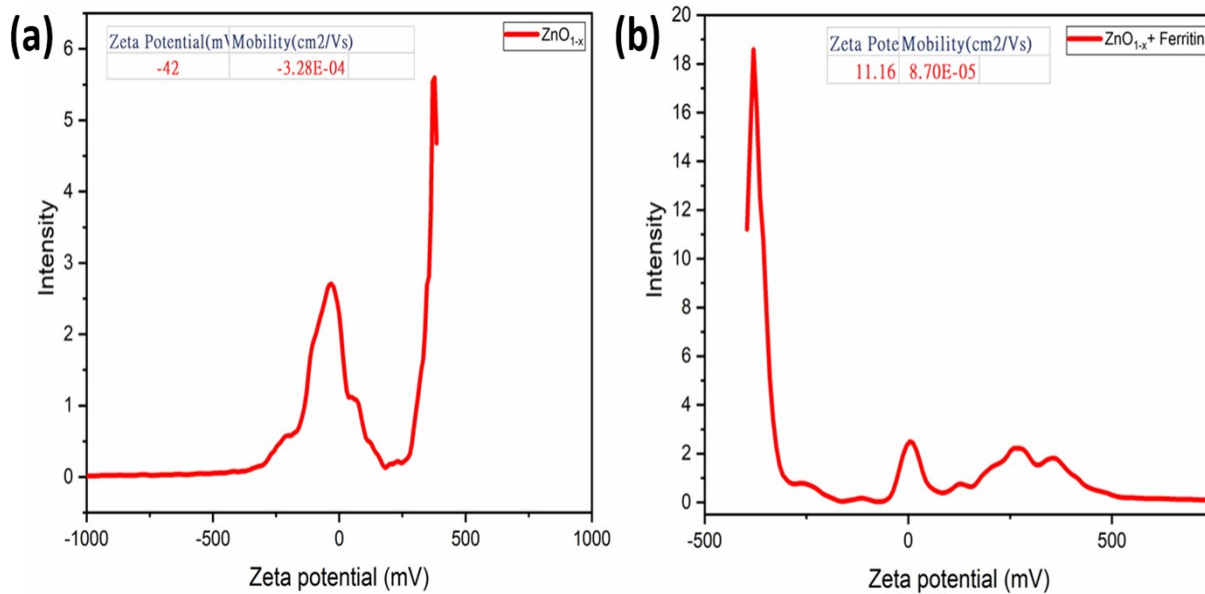

**Fig. S7.** Zeta potential studies for (a) ZnO<sub>1-x</sub> nanosheets, (b) ZnO<sub>1-x</sub> + Ferritin
